# Supplementary material for: Linear and star-shaped polynuclear Ru(ii) complexes of 2-(2′-pyridyl)benzimidazolyl derivatives: syntheses, photophysical properties and red light-emitting devices
Source: Royal Society of Chemistry journal article supplement (doi:10.1039/b515675k), 2006-01-01
Supplement: b515675k.pdf [file b515675k.pdf]

## Supporting materials

### **Linear and Star-shaped Polynuclear Ru(II) Complexes of 2-(2'-Pyridyl)benzimidazolyl Derivatives: Syntheses, Photophysical Properties and Red Light-Emitting Devices**

Wen-Li Jia,<sup>a</sup> Yu-Feng Hu,<sup>b</sup> Jun Gao,<sup>b</sup> Suning Wang<sup>\*a</sup>

<sup>a</sup>Department of Chemistry, Queen's University, Kingston, Ontario, K7L 3N6, Canada

<sup>b</sup>Department of Physics, Queen's University, Kingston, Ontario, K7L 3N6, Canada

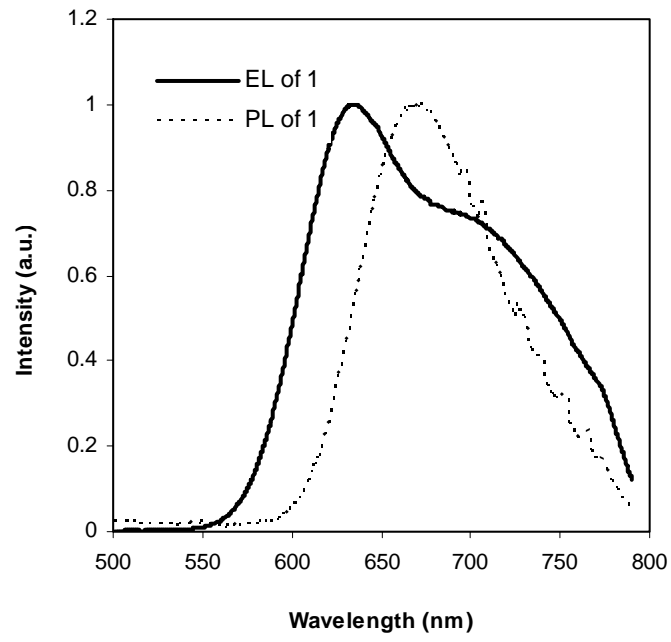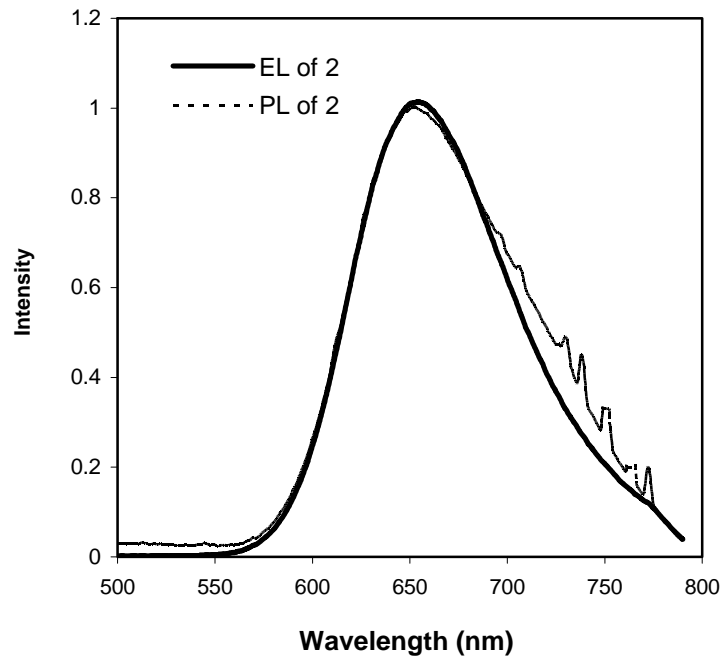

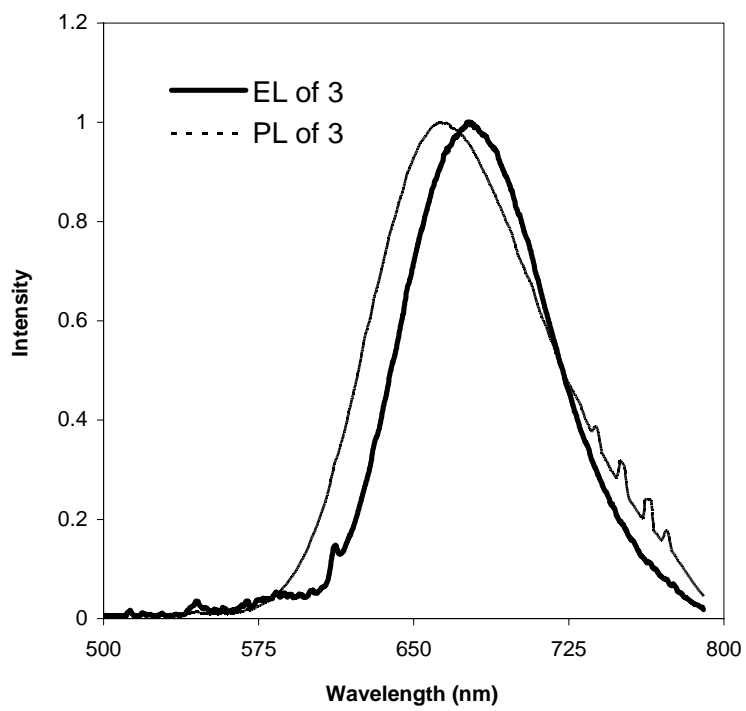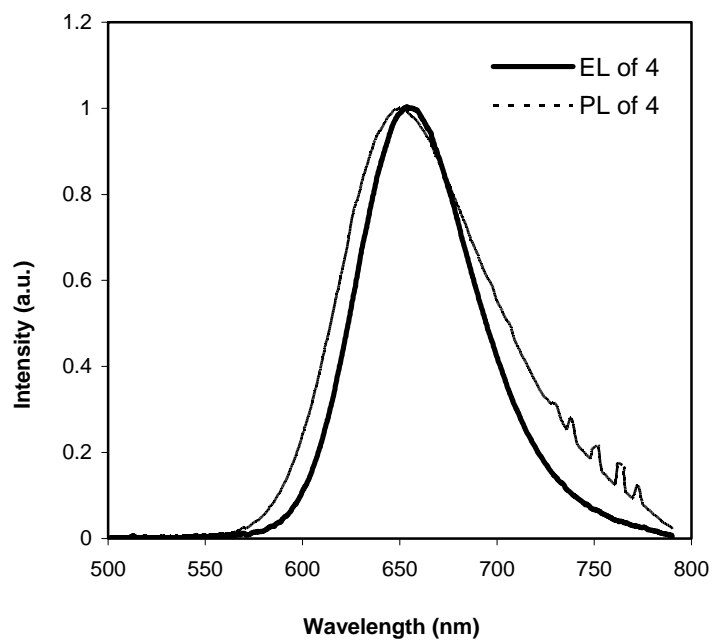

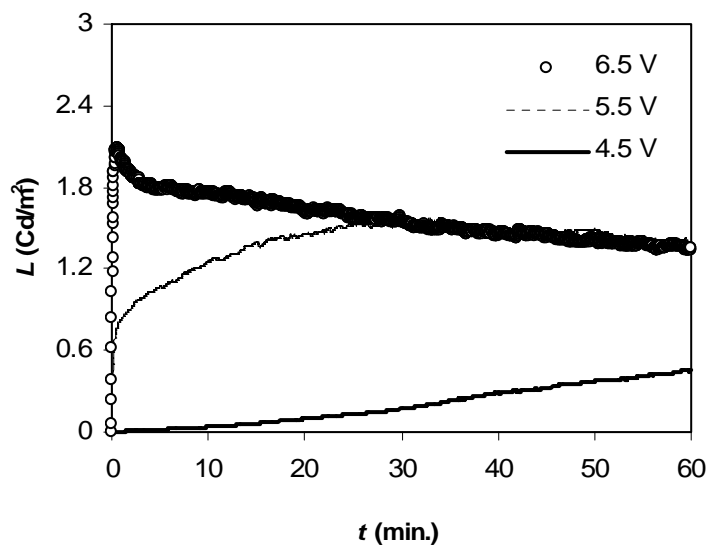

*L-V-t* diagram for device 3

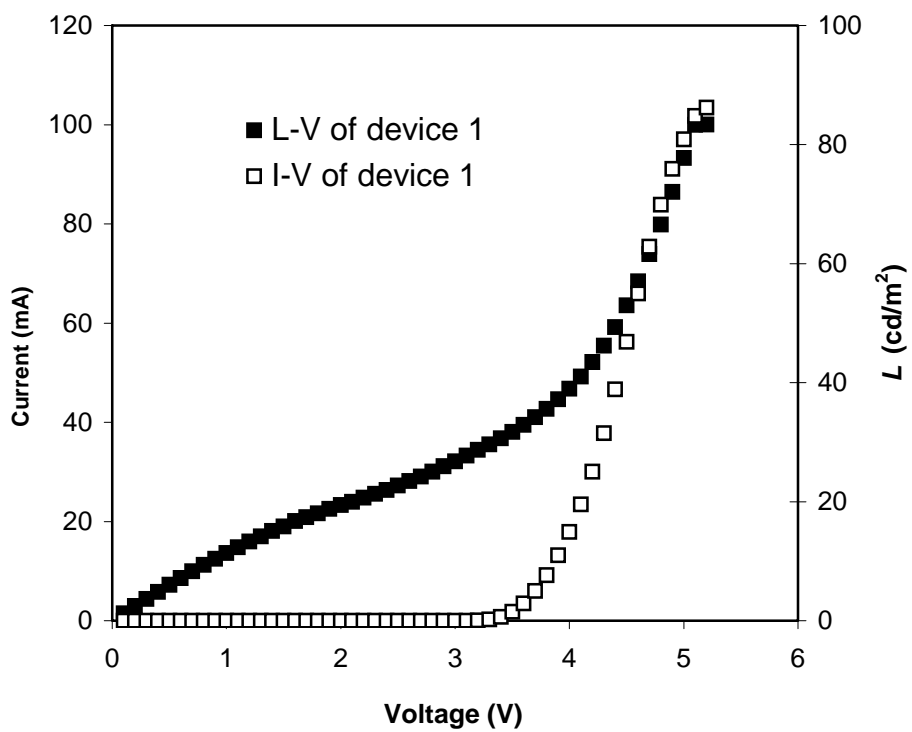

*I-L-V* diagram for device 1

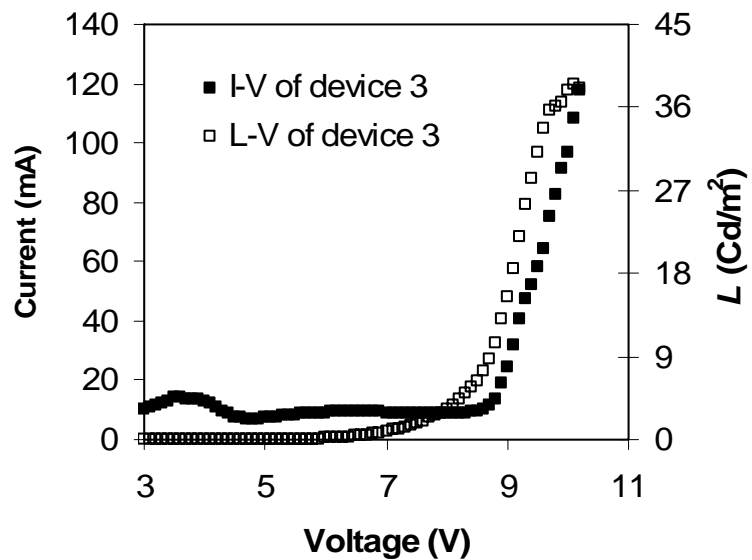

I-L-V diagram for device 3

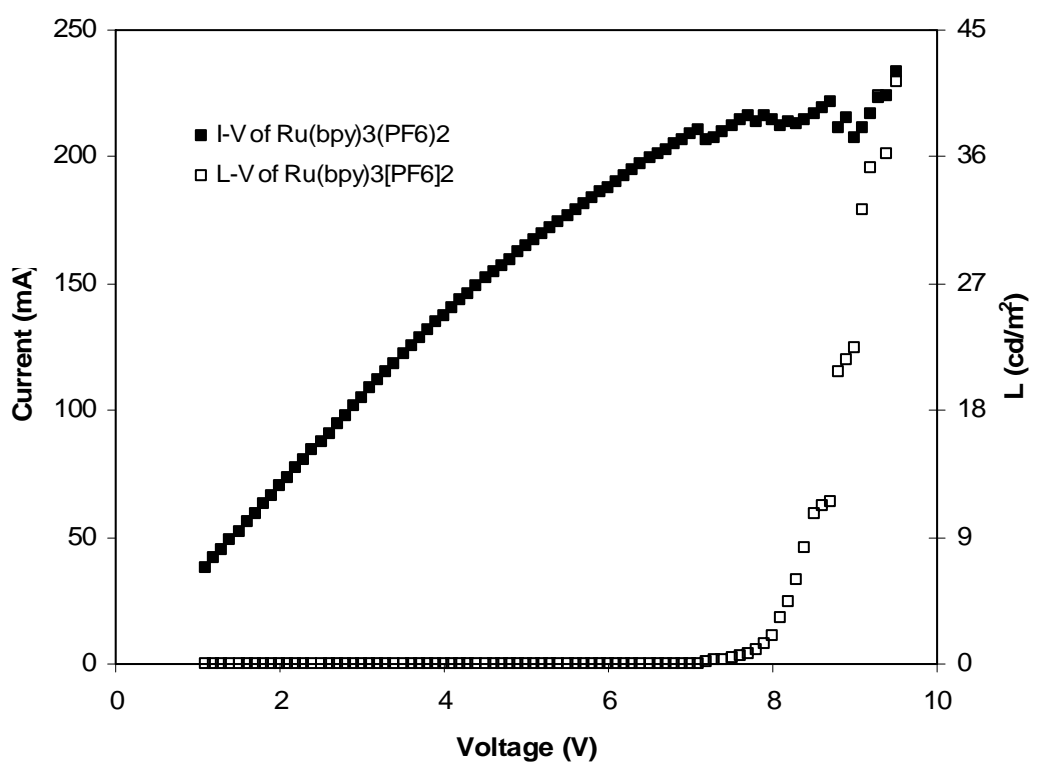

I-L-V diagram for device based on [Ru(bpy)<sub>3</sub>][PF<sub>6</sub>]<sub>2</sub>
